# Supplementary material
Source: PubMed Central journal article supplement (PMC7033978)
Supplement: ao9b03617_si_001.pdf [file ao9b03617_si_001.pdf]

**Synthesis of Poly(methacrylic acid) / Montmorillonite Hydrogel Nanocomposite for Efficient Adsorption of Amoxicillin and Diclofenac from Aqueous Environment: Kinetic, Isotherm, Reusability and Thermodynamic Investigations**

Suhail Ayoub Khan, Mohammad Fuzail Siddiqui, and Tabrez Alam Khan\*

Department of Chemistry, Jamia Millia Islamia, Jamia Nagar, New Delhi 110 025, India

\*Corresponding Author: Tel. +91 11 26985938; e-mail: [takhan@jmi.ac.in](mailto:takhan@jmi.ac.in),

takhan501@yahoo.com (TA Khan)

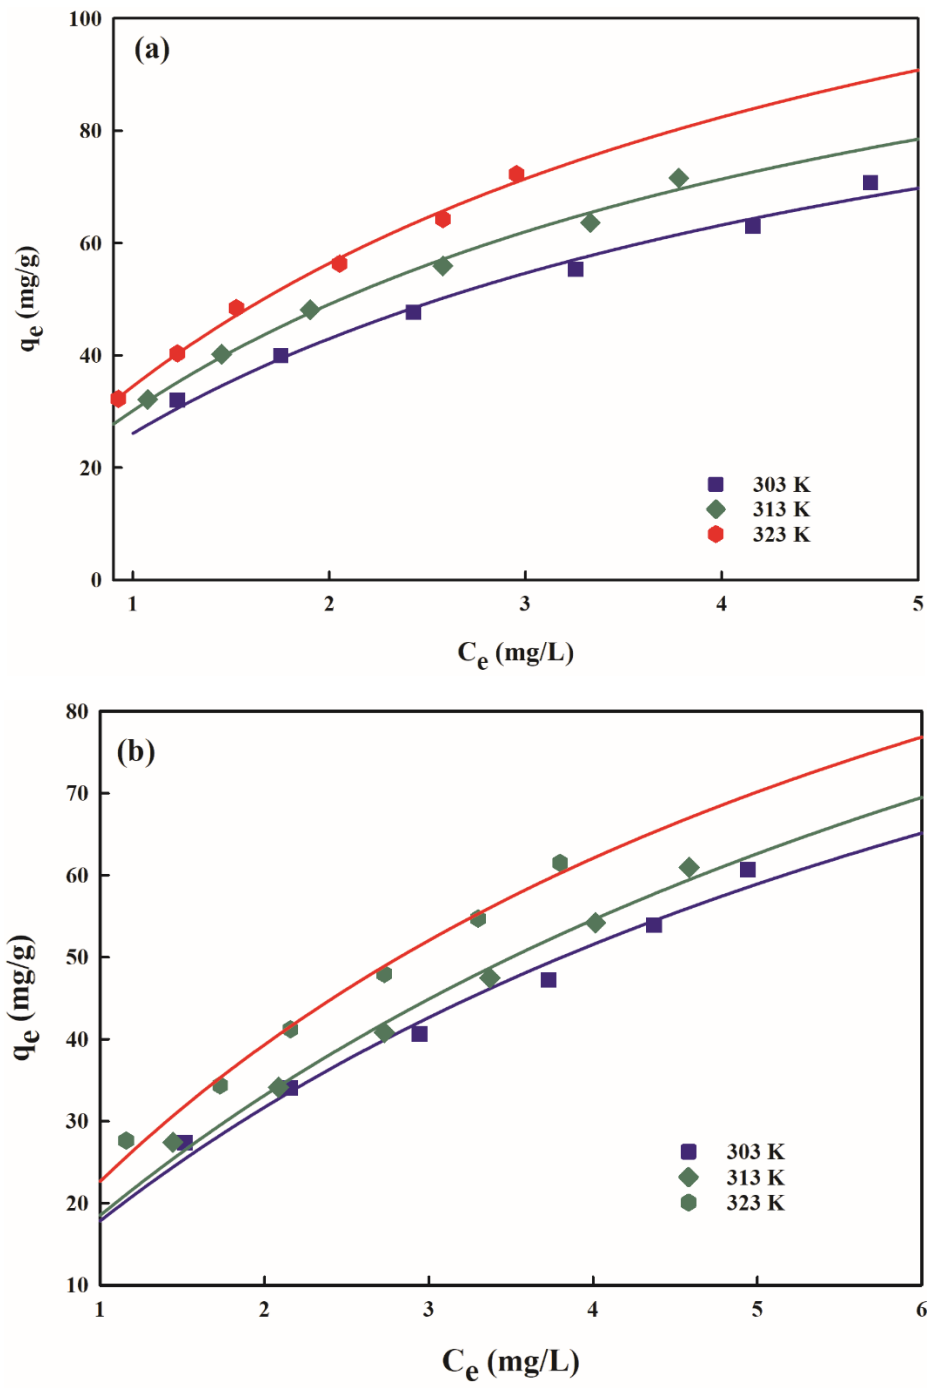

**Figure S1:** Langmuir isotherm plots for (a) AMX, and (b) DF removal

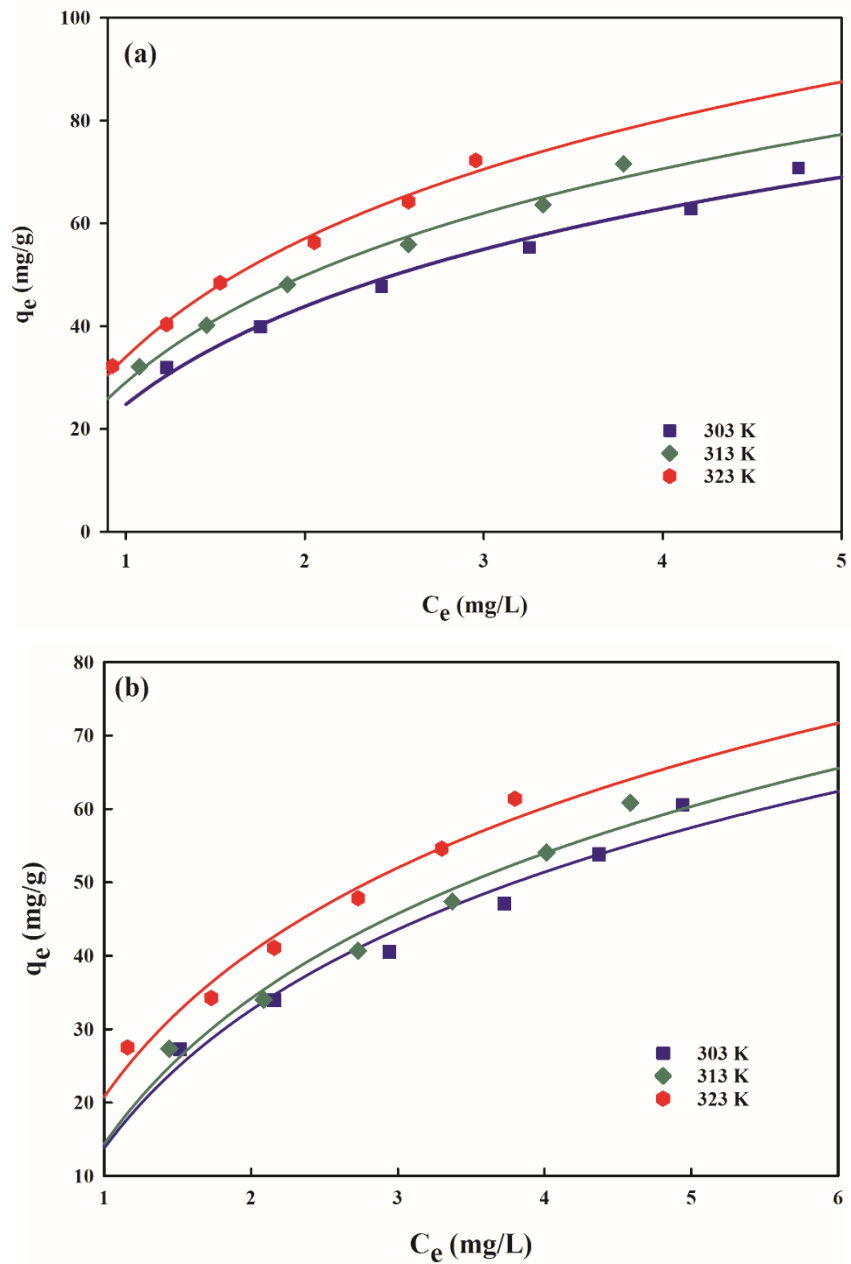

**Figure S2:** Temkin isotherm plots for (a) AMX, and (b) DF removal

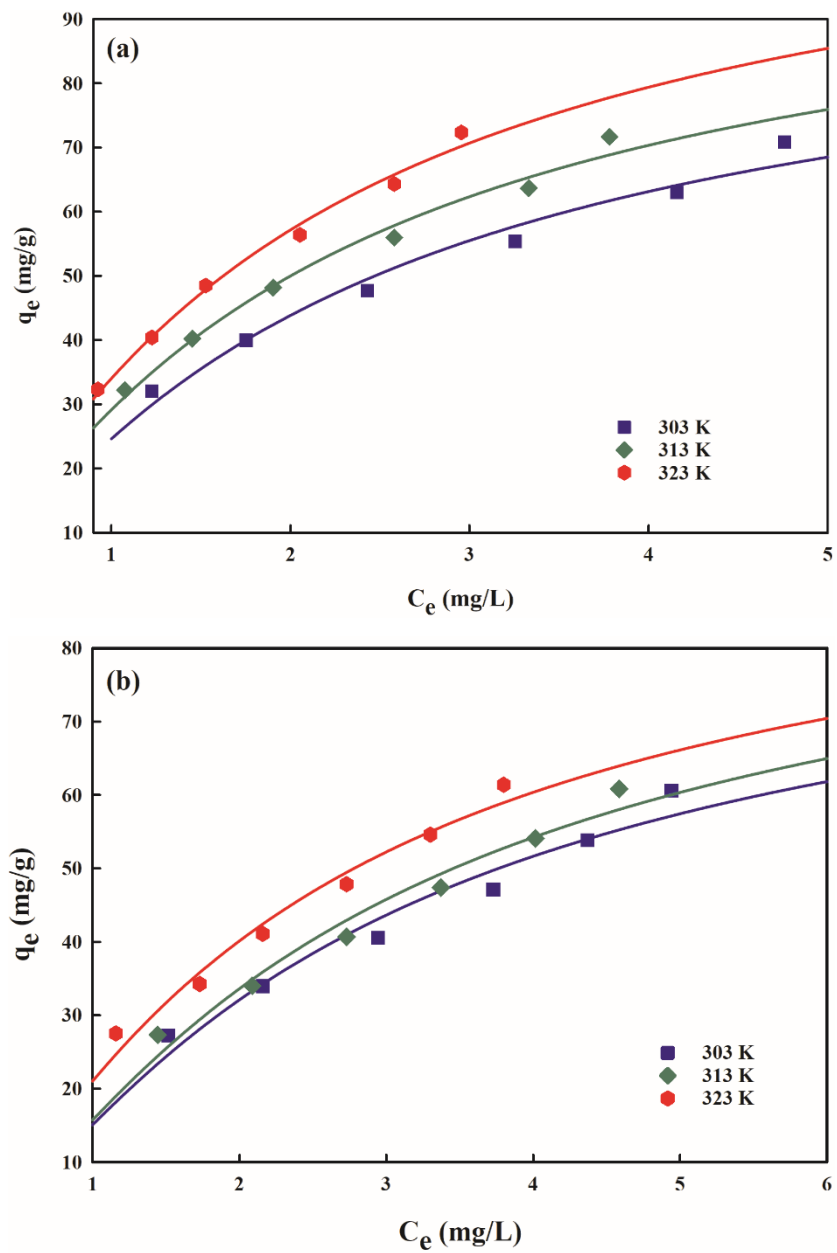

**Figure S3:** D-R isotherm plots for (a) AMX, and (b) DF removal

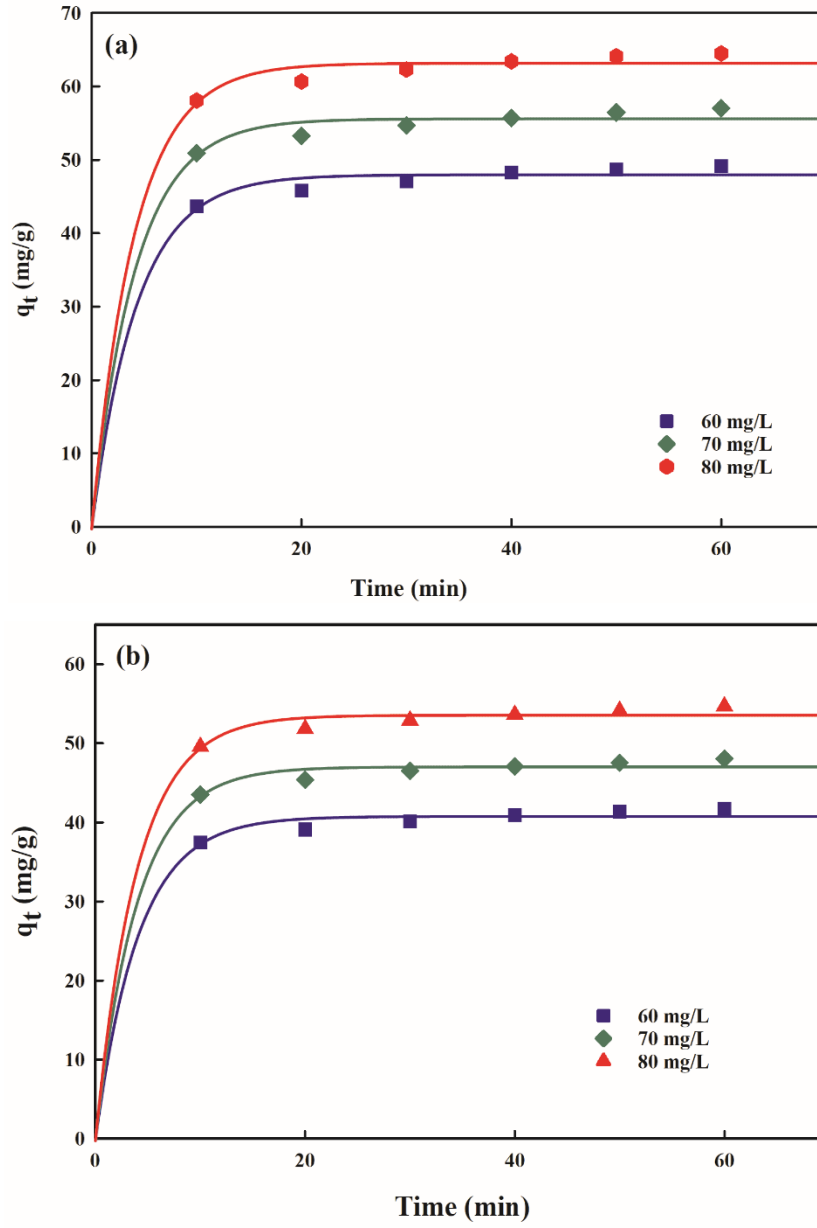

**Figure S4:** Pseudo-first order plots for (a) AMX, and (b) DF removal

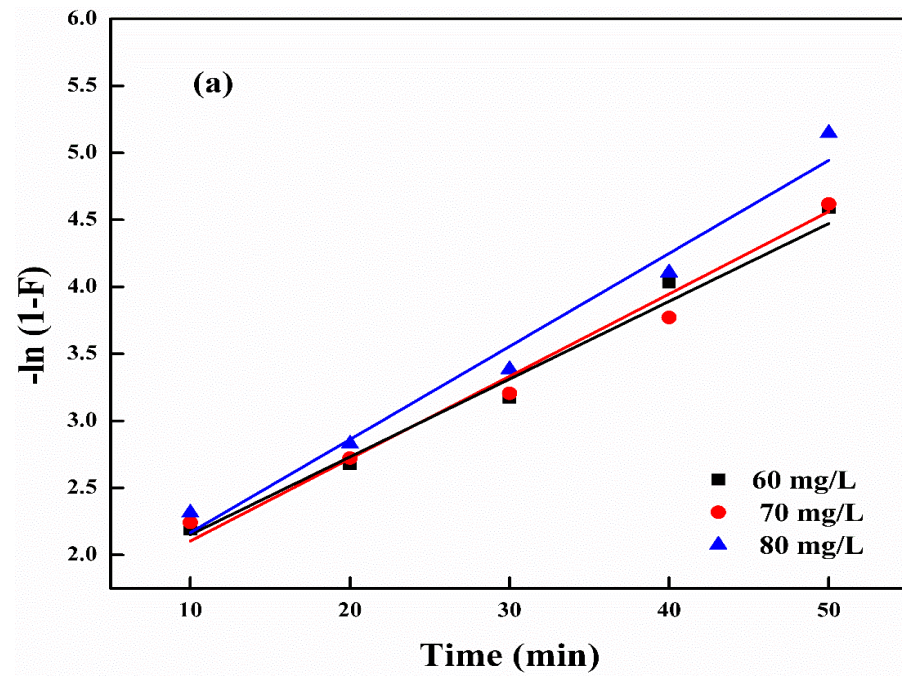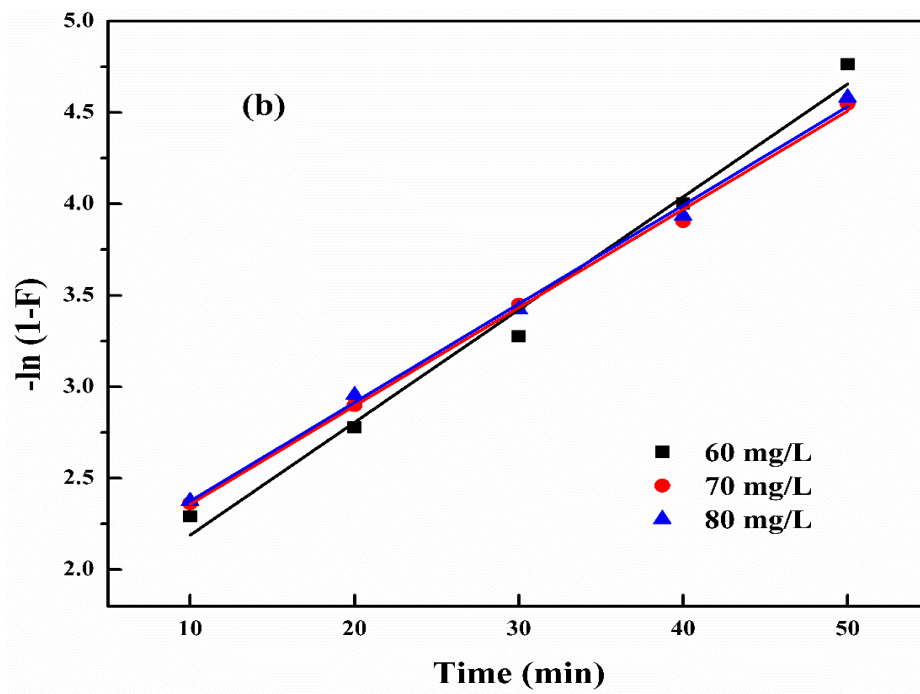

**Figure S5:** Liquid film diffusion plots for (a) AMX, and (b) DF removal

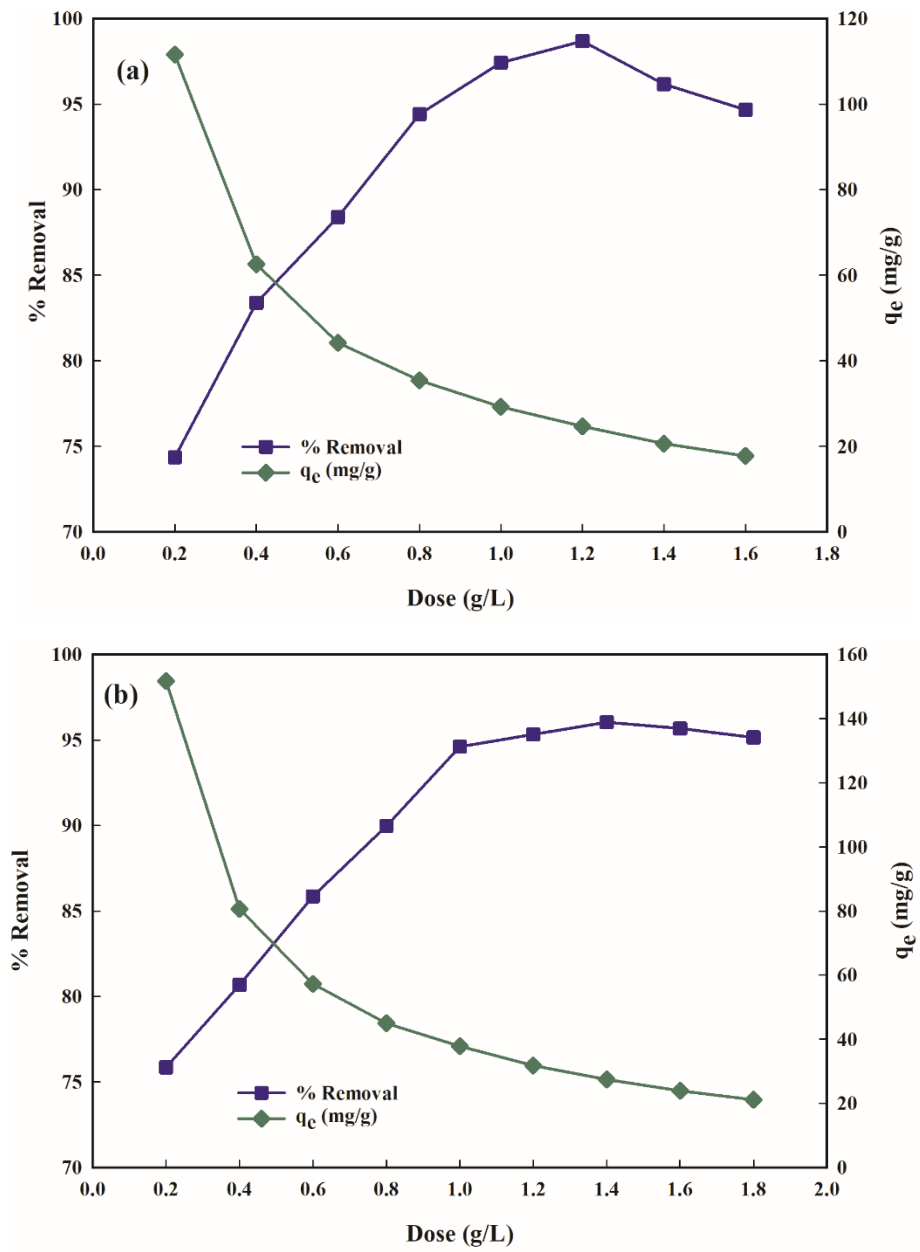

**Figure S6:** Effect of adsorbent dose on (a) AMX, and (b) DF removal

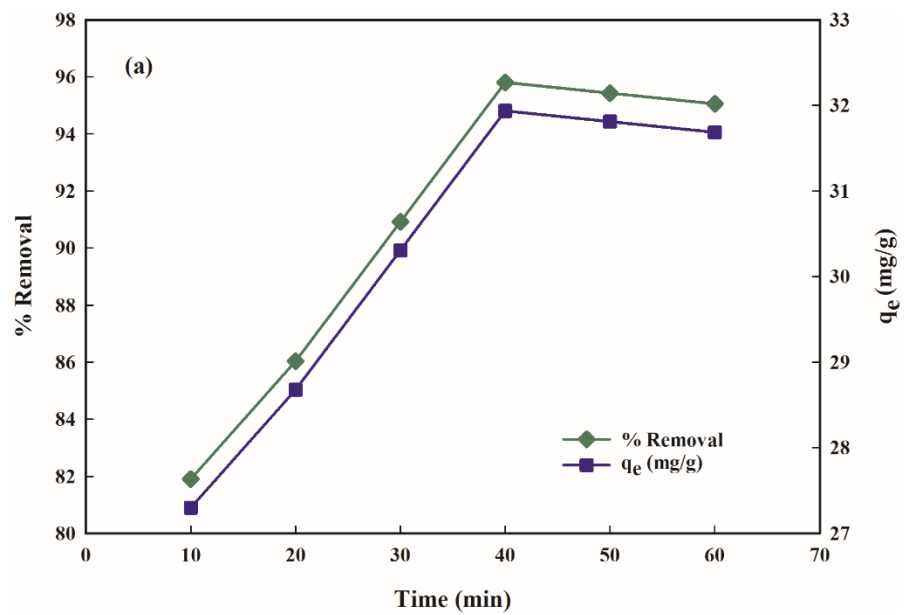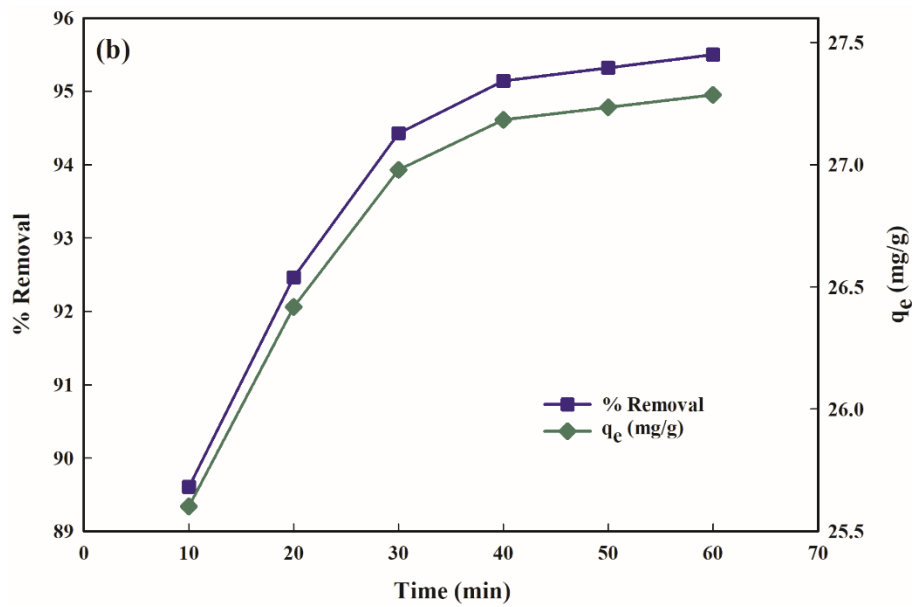

**Figure S7:** Effect of contact time on (a) AMX, and (b) DF removal
